# Supplementary material
Source: Research Square preprint supplement (doi:10.21203/rs.3.rs-9883112/v1)
Supplement: Supplementary file 1 [file 18bb7b9c1196e64313005967.xlsx]

## Sheet: Sheet1
			Tale S1 Sampling sites and geographical coordinates. T represents tributary, N are samples from the river, and C represents channels and informal drainages
			Site	Site names		Coordinates
			T1	Muyanza		1o46'15''S	30o07'21''E
			T2	Cyamutara		1o46'40''S	30o07'49''E
			T3	Muhazi lake		1o46'46''S	30o08'19''E
			N1	Joint point Muhazi -Muyanza Cyamutara		1o47'06''S	30o07'57''E
			T4	Kajevuba tributary		1o47'39''S	30o07'47''E
			N2	Cyamarita		1o48'32''S	30o07'41''E
			T5	Rusine tributary		1o48'53''S	30o05'50''E
			N3	Nyabugogo Rusine		1o48'54''S	30o05'51''E
			T6	Marenge centre		1o49'34''S	30o04'46''E
			N4	Marenge -Nyange 1		1o50'14''S	30o04'57'' E	3008263	-183739
			N5	Nyange /Quarrying (stones-sand)		1o50'27''S	30o05'10'' E	300860719	-184112
			N6	Jabana Mukobwa mwiza		1o50'32''S	30o05'17'' E	300883195	-184241
			N7	Nyacyonga Strabag near centre		1o51'34''S	30o05'42'' E	300950657	-185955
			T7	Nyacyonga		1o52'01''S	30o05'18''E	300875864	-186718
			N 8	Nyacyonga centre- Bridge		1o51'58''S	30o05'15''E	300885458	-186619
			C1	Jabana canal from rice plantation		1o52'58''S	30o04'38''E	300772646	-188296
			N9	Jabana near rice plantation		1o52'59''S	30o04'38''E	30077461	-188418
			C2	Kabuye sugar works factory channel		1o53'30''S	30o04'12''E	300701111	-189377
			N10	Nyabugogo (100m from Kabuye Factory)		1o53'31''S	30o04'09''E	300693841	-189213
			N11	Jabana ku mavoka		1o53'42''S	30o03'49''E	300693841	-189531
			N12	Gisozi bridge
			T8	Karuruma river		1o54'08''S	30o03'03''E	300518457	-190229
			N13	Nyabugogo+Karuruma river		1o54'21''S	30o03'08''E	300516361	-190481
			C3	Gatsata- Prowater channel		1o54'48''S	30o02'57''E	300492138	-191337
			N14	Nyabugogo+ water from Prowater		1o54'50''s	30o02'59''E	300498826	-191416
			C4	Channel from Rubis Station		1o55'03''S	30o02'54''E	300485105	-19175
			N15	Gatsata near Rubis petrol station		1o55'03''S	30o02'58''E	300495900	-191755
			C5	Akamwunguzi channel 1		1o55'32''S	30o02'54''E	300476463	-192578
			C6	Akamwunguzi channel 2		1o55'32''S	30o02'51''E	300475461	-192573
			C7	Akamwunguzi channel 3		1o55'30''S	30o02'51''E	300484896	-192527
			N16	Nyabugo Rwantexco bridge		1o55'58''S	30o02'57''E	300493504	-193295
			C8	Channel from Gatsata garage		1o56'18''S	30o02'44''E	300446361	-193837
			N17	Nyabugogo between garage & Bridge		1o56'17''S	30o02'40''E	300456922	-193821
			T9	Mpazi		1o56'23''S	30o02'41''E	300449068	-19398
			C9	Channel from food market		1o56'20''S	30o02'42''E	300452499	-193905
			N18	Nyabugogo Gatsata bridge 2		1o56'21''S	30o02'35''E	300436941	-0,93928
			N19	Nyabugogo Bridge near Car park		1o56'21''S	30o02'35''E	300436941	-193928
			N20	Nyabugogo near Gatsata shops
			N21	Gatsata Nyabugogo at 100 m of bridge		1o56'25''S	30o02'34''E	300428011	-194042
			N22	Nyabugogo Discentre		1o56'22''S	30o02'37''E	300433346	-193944
			T10	Yanze river		1o56'34''S	30o02'03''E	300342335	-194297
			N23	Nyabugogo + Yanze river water		1o56'36''S	30o02'01''E	300338266	-194337
			N24	Riverside Motel(Arsenal)		1o56'49''S	30o01'14''E	300207657	-194695
			N25	Nyabugogo/ Nzove		1o56'53''S	30o01'04''E	300177706	-194809
			N26	Nyabugogo/Nyabarongo		1o57'17''S	30o00'24''E	300024270	-195333
				26 samples from the river, 10 samples from tributaries and 9 samples from channels and drainages
