# Supplementary material
Source: Research Square preprint supplement (doi:10.21203/rs.3.rs-9883112/v1)
Supplement: Supplementary file 2 [file 4d6df8a809b90055a5bc77dc.xlsx]

## Sheet: Sheet1
Table S3 Raw data of detected pharmaceuticals and their therapeutic groups
	Therapeutic group	LOQ	T1	T2	T3	N1	T4	N2	T5	N3	T6	N4	N5	N6	N7	T7	N8	C1	N9	C2	N10	N11	N12	T8	N13	C3	N14	C4	N15	C5	C6	C7	N16	C8	N17	T9	c9	N18	N19	N20	N21	N22	T10	N23	N24	N25	N26
Abacavir	Antiretroviral	2	<LOQ	<LOQ	12.515	3.52413	4.17471	3.34088	<LOQ	2.67336	5.33742	2.75631	2.35916	2.01681	1.66926	101.254	3.31923	<LOQ	2.62683	9.76095	2.44083	2.18267	1.7296	88.4026	2.81722	0.48032	2.27295	6.10341	2.15377	220.568	172.736	190.999	5.89887	216.295	15.4412	378.059	432.49	75.1196	74.0852	73.5516	68.5562	64.0715	28.7055	48.3665	44.2887	39.9648	36.2144
Aciclovir	Antiretroviral	0.1	<LOQ	<LOQ	0.838855	0.344955	0.296713	0.298684	0.123291	0.21148	0.172446	0.181241	0.126394	0.0949153	0.0834627	5.48123	0.513463	<LOQ	0.398607	0.661483	0.424925	0.333943	0.259524	2.56287	0.362872	0.100855	0.296136	<LOQ	0.225859	3.0954	3.77502	1.90292	0.401177	21.5134	0.565092	44.7787	54.8401	12.9744	14.5431	10.829	9.53548	7.13196	<LOQ	3.93747	3.07806	2.5354	4.61851
Albendazole	Antihelminthic	2	191.828	<LOQ	207.288	152.074	312.937	164.029	241.896	167.39	251.807	180.506	164.009	155.627	137.017	227.772	143.812	<LOQ	133.978	51.4325	125.464	120.891	115.352	313.541	135.648	83.1482	115.349	<LOQ	107.824	3536.29	2934.34	1796.21	773.869	2850.25	1292.39	3559.54	4184.57	2214.37	2135.07	1937.49	1836.34	1775.81	347.511	1201.06	1189.54	1117.28	1110.38
Aminosalicylic acid	Antimicobacterial	0.5	25.9173	3.93708	90.5867	45.2813	126.92	56.7237	99.7558	68.1409	75.3474	68.5861	64.5717	60.6319	55.0513	99.3642	60.1178	<LOQ	52.5139	45.8344	48.4367	45.1893	40.8394	60.8178	45.2327	31.021	38.5062	15.8797	32.0238	106.534	123.038	121.496	55.1289	177.723	77.9489	179.008	200.441	105.136	104.022	103.155	100.467	97.7338	2.84703	65.847	60.3972	56.2603	50.2553
Amlodipine besylate	Calcium blocker	1	3.68005	5.10339	23.0408	14.3926	23.5023	15.0104	7.60375	13.4025	9.43313	10.008	8.58288	6.06069	4.95578	43.9803	6.9503	3.82976	3.55566	4.32161	2.90278	2.42404	2.13003	16.7695	3.16985	1.80854	2.43449	5.2206	2.17132	14.8358	17.5793	19.1974	3.50771	34.9365	6.04859	69.6029	72.5961	17.6719	17.5382	17.2927	16.5703	14.9478	13.5404	14.2241	12.949	11.6131	8.2866
Amoxicillin	Antibacterial	5	2.25035	4.37259	12.7361	7.1469	79.9907	12.1721	40.6302	16.5315	23.0784	18.5403	15.5764	13.809	10.902	98.7349	20.6511	1.8792	16.7874	13.811	12.8398	10.3996	8.12932	117.626	14.6546	<LOQ	8.89973	<LOQ	5.53359	167.732	156.684	159.92	20.8164	<LOQ	15.798	244.901	246.235	92.8711	88.624	85.1083	82.399	74.4306	7.82697	47.326	42.8406	40.232	35.834
Atazanavir	Antiretroviral	7	29.8393	49.3411	62.243	52.3972	40.6088	46.6299	57.145	48.8626	66.6946	51.9289	48.6682	46.651	43.8544	274.456	70.9666	<LOQ	63.8192	19.1853	52.6771	50.4274	48.8327	159.992	59.2242	22.4483	51.8252	10.3354	43.9133	147.291	230.989	320.139	70.2786	132.336	95.0522	337.322	288.904	157.102	152.783	149.839	146.307	140.079	17.9827	85.2779	80.6436	76.3649	69.0908
Atenolol	Beta Blocker	5	0.649228	0.698186	17.1369	5.68306	3.66803	4.94993	2.37247	3.51004	1.65072	2.798	2.15389	1.82128	1.34205	27.0135	2.34899	<LOQ	2.12749	0.412374	1.66754	1.52493	1.41298	12.6771	2.14144	1.62076	1.82028	3.12485	1.87073	33.5806	24.0041	18.7369	4.6963	32.0629	5.84283	43.858	99.7611	13.4602	13.3915	11.9445	10.1692	9.25041	11.5299	10.0288	8.31791	6.65035	6.06015
Caffeine	Psychoanaleptic	10	1.04508	1.10099	73.3383	26.313	11.5036	24.2927	10.2891	21.0063	15.6067	16.1109	13.1939	10.8356	8.55776	21.1297	12.8376	0.0896545	9.60226	10.6043	9.71424	8.65886	7.1569	9.89673	8.09705	5.51615	7.10156	4.80636	6.78494	100.515	102.6	99.2571	15.9229	119.294	20.0038	423.339	527.51	221.51	220.076	218.489	198.338	180.374	1.3836	70.3599	61.4603	55.8647	49.2488
Carbamazepine	Antiepileptic	1	0.632548	0.938613	2.56429	1.66293	4.72631	1.73084	2.77522	1.9789	3.81358	2.41506	1.97225	1.61374	1.1824	5.12087	2.16408	0.16658	2.01541	0.215626	1.61318	1.30156	1.00439	5.12392	1.71946	2.6972	1.6558	1.60134	2.03688	7.53964	7.09072	7.29849	3.42299	16.9818	6.4417	28.2898	24.4262	12.3831	12.1786	11.4061	10.813	7.7349	1.69265	4.86533	4.23541	3.75922	3.20631
Cetirizine	Antihistaminic	5	0.454774	0.407164	1.08896	0.603427	0.566343	0.530737	0.436517	0.450085	0.565546	0.466724	0.426954	0.366818	0.300265	2.52957	1.07785	<LOQ	0.786912	0.594591	0.710313	0.659432	0.580029	3.45606	1.14503	0.242523	0.740531	6.5267	0.784124	9.31647	5.90705	7.83643	1.39822	<LOQ	0.826168	5.75136	4.24952	1.87901	1.86543	1.63716	1.59177	1.23626	1.18392	1.20735	1.00811	0.823726	0.746109
Chlorpheniramine	Antihistaminic	1	1.32741	0.697843	4.58526	1.35644	1.55056	1.45275	0.393223	1.26819	1.81441	1.4137	1.10452	0.838003	0.684665	1.63328	1.00103	<LOQ	0.608398	0.408198	0.495625	0.418408	0.262143	3.2147	0.933784	0.95122	0.928547	1.03819	0.861077	5.91553	4.06877	5.48332	2.15277	7.39976	2.84438	33.8822	24.0734	6.5257	8.36471	5.32057	5.04295	4.60243	0.725219	2.50803	2.229	1.91382	3.16563
Ciprofloxacin	Antibacterial	10	0.233831	0.200887	27.7557	10.8769	6.09432	7.51204	25.0559	11.0552	32.1615	17.3823	13.8754	10.3713	7.72155	5.93404	5.93252	<LOQ	4.48351	3.44683	2.92966	2.2413	1.88957	42.7517	3.18772	0.895082	2.58858	2.59091	2.38266	93.1128	85.7831	98.1158	6.84999	252.648	14.0185	432.874	385.226	62.8474	57.4872	55.1119	53.6066	48.1366	1.02897	30.1977	26.0789	22.2123	15.9455
Clarithromycin	Antibacterial	1	27.8325	22.7272	46.5735	33.3408	25.697	28.433	52.6412	33.9912	<LOQ	27.3577	23.3399	18.4404	14.4551	76.8744	26.2711	<LOQ	20.5982	<LOQ	15.4203	13.0338	10.1736	<LOQ	6.01304	26.3254	6.82878	<LOQ	3.21588	<LOQ	351.695	355.291	24.3939	191.27	41.9187	505.373	653.44	93.3211	92.3949	90.0949	87.2756	83.4399	40.3437	60.3437	54.3437	47.6138	40.631
Clotrimazole	Stomatological drug	1	3.46225	4.37858	13.0385	7.50915	<LOQ	6.05123	6.81694	6.31764	<LOQ	5.20804	4.70804	4.35692	4.01047	20.2526	4.85868	<LOQ	3.96805	2.31586	3.32479	2.85872	2.41892	75.0428	3.99402	9.12261	4.02443	<LOQ	3.46283	<LOQ	<LOQ	<LOQ	1.80336	112.539	6.02679	188.79	215.192	74.3496	74.2462	72.7908	69.6854	64.1184	<LOQ	43.895	39.9429	35.8127	29.8931
Cloxacillin	Antibacterial	1	14.2235	23.6956	35.9779	24.4634	37.1739	29.7216	23.7567	25.854	32.6615	26.7762	23.4162	21.6356	19.715	37.7871	21.772	<LOQ	16.5612	31.6904	21.2565	17.6586	13.9832	90.3354	20.3798	8.39111	15.4415	2.19002	11.3059	109.904	114.734	<LOQ	20.3461	137.976	23.5084	329.053	358.077	121.666	119.857	117.738	115.285	99.8323	4.71353	54.8953	49.5486	41.1878	36.2145
Darunavir	Antiretroviral	5	<LOQ	1.24646	4.03986	2.01689	<LOQ	1.02509	<LOQ	0.665492	1.16455	0.645711	0.601755	0.560853	0.525149	2.75042	1.02611	<LOQ	0.613977	0.565289	0.548007	0.488511	0.431777	3.84171	1.90249	0.879665	1.44327	<LOQ	0.879794	2.45046	1.99601	<LOQ	1.90661	4.86865	2.66865	4.66019	5.69165	3.24244	3.14277	2.75579	2.47763	2.00115	<LOQ	1.40252	1.08191	0.818244	0.640419
Dexamethazone	Stomatological drug	0.5	4.37635	5.85456	10.1005	6.46974	5.7946	5.88443	9.2851	6.60408	12.3217	7.78641	7.31096	7.01855	7.007	19.1783	8.55701	<LOQ	7.70984	2.13015	6.85683	6.42425	6.04661	5.34249	5.51266	3.41683	5.12546	1.67971	4.3111	16.7014	19.6611	18.1155	7.35819	19.5574	9.22184	43.7884	78.5456	20.3395	19.4729	19.2859	18.8733	16.2963	7.96434	13.0767	11.9876	9.75663	7.21178
Diazepam	Psycholeptic	4	0.732928	1.37217	2.87055	1.91736	1.05911	1.46599	1.55276	1.46542	1.55783	1.35067	1.03647	0.766702	0.340545	8.57087	1.12842	<LOQ	0.658299	0.62218	0.62117	0.574604	0.534408	18.8422	0.484925	<LOQ	0.422285	0.147329	0.369462	19.7152	22.5993	19.9281	1.02622	26.4552	2.55249	39.2798	37.8805	9.21267	9.20887	9.15541	8.80109	8.4464	2.13216	6.57019	5.24546	4.33085	3.74925
Diclofenac	Antiinflammatory/Antirhumatic	2	4.23172	12.5322	4.56801	5.93794	5.34393	5.09757	6.55396	5.36915	3.36842	4.49142	4.10993	3.73225	3.31304	9.26397	5.14025	0.411469	4.31969	3.35453	3.6975	3.32643	3.04722	2.46368	2.51013	0.576698	2.19267	0.914152	1.62636	<LOQ	62.6971	44.7024	2.21327	16.5042	5.81664	62.2855	53.5933	14.7614	14.1324	14.1169	12.8212	9.92205	0.627542	6.26475	5.65883	5.29902	4.45521
Diltiazem	Calcium blocker	0.5	0.359639	0.218566	0.815074	0.421922	0.124576	0.349878	0.522489	0.332429	0.0357123	0.245799	0.218003	0.193022	0.168822	0.928826	0.245137	<LOQ	0.218457	0.0161125	0.151436	0.121341	0.105253	0.16881	0.13531	<LOQ	0.10761	<LOQ	0.0707174	0.854108	0.884499	1.01171	0.200345	1.10732	0.60749	2.19825	3.08397	1.80079	1.83965	1.74719	1.73791	1.63096	<LOQ	0.947387	0.720331	0.524426	0.44418
Efavirenz	Antiretroviral	2	3.03672	1.54188	23.8083	13.2436	8.01186	8.87528	9.55297	8.94726	8.17941	8.90865	8.33114	8.01156	7.77698	14.4616	8.26402	<LOQ	7.50016	4.08576	6.89766	6.47265	6.10156	53.0965	8.73952	0.935191	8.00301	11.863	7.74028	106.011	<LOQ	118.164	11.0235	135.186	20.2879	225.771	264.871	80.8706	78.4013	76.7584	73.8307	69.4948	3.85651	43.8565	40.0216	36.7264	30.1828
Ethambutol hydrochloride	Antimicobacterial	1	0.0543255	0.102788	2.10811	0.950823	0.537655	0.874602	1.3991	0.873432	0.731244	0.805312	0.751554	0.717269	0.662743	22.3411	0.680271	<LOQ	0.602699	0.445971	0.492847	0.451811	0.42028	16.7137	0.523327	0.148694	0.486502	0.0700283	0.401668	195.977	176.163	147.798	3.78505	140.595	6.88447	165.858	179.561	71.3871	71.2977	70.941	68.8181	65.6075	2.01842	42.0831	36.387	33.8121	27.617
Fexofenadine	Antihistaminic	0.1	<LOQ	<LOQ	0.569218	0.134218	0.73172	0.129641	0.75745	0.148239	0.625985	0.162392	0.112392	0.0751179	0.0351142	4.98641	0.17616	<LOQ	0.118891	0.384843	0.108564	0.0828712	0.0351398	7.67508	0.041442	0.489511	0.0164606	<LOQ	<LOQ	5.83759	5.27267	4.9332	0.961546	13.1037	2.46856	34.7528	34.7093	7.72025	7.58306	7.43248	7.27873	6.80294	1.10981	4.63309	3.00642	1.88075	1.81813
Haloperidol	Psycholeptic	0.1	0.250099	<LOQ	0.263659	0.236546	0.18704	0.181035	0.228057	0.188676	0.039243	0.142144	0.107949	0.0848429	0.0780026	0.264578	0.115776	<LOQ	0.0862006	0.0662006	0.0812006	0.0781675	0.0714652	0.330853	0.122305	<LOQ	0.100305	<LOQ	0.0712071	0.349071	0.426928	0.305031	0.171465	<LOQ	0.139491	0.717689	0.736641	0.300188	0.309558	0.29866	0.267016	0.218075	<LOQ	0.140754	0.110852	0.0805686	0.0846617
Ibuprofen	Antiinflammatory/Antirhumatic	5	12.0726	16.2933	24.9656	18.3952	11.3305	16.6013	29.109	18.0601	11.6675	16.1993	15.3812	14.8507	14.2567	58.1381	16.4002	<LOQ	12.8756	3.86501	10.6881	10.0832	9.48674	31.992	10.1074	6.4838	9.13547	1.86648	8.66051	25.2117	37.9994	27.0734	12.5254	32.5864	17.7596	86.3892	66.9747	33.9606	33.7791	33.1324	32.6993	32.0661	13.3927	25.1842	22.992	18.5985	14.2774
Irbesartan	Angiotensive	0.5	2.18592	1.48551	14.0501	5.04043	2.90084	4.10046	9.02071	5.78191	<LOQ	5.55909	5.15507	4.64486	4.23328	32.1367	6.07148	<LOQ	5.52975	1.39789	4.60788	4.23942	3.89895	24.893	5.44484	5.12244	5.2855	<LOQ	4.51285	30.4469	42.3557	35.1706	9.05513	72.2357	15.9581	101.312	122.78	36.374	35.1471	33.4117	30.8089	25.258	5.71615	18.1943	14.6191	9.09099	9.42703
Isoniazid	Antimicobacterial	2	1.40417	3.72537	23.7254	7.43479	8.21339	7.48308	4.02977	6.81657	2.34385	5.27709	4.76509	4.53972	4.39057	27.921	7.11431	<LOQ	6.81231	1.92422	6.12324	5.5042	5.47856	26.1647	8.67523	2.12843	7.27331	2.87742	6.75967	40.1471	52.9613	67.3112	17.51	79.053	25.5412	198.827	249.744	59.6939	56.6189	52.454	50.6184	43.9675	2.44271	27.7141	22.072	19.4118	15.0647
Ketamine	Anesthetic	0.1	0.00444336	0.0176685	0.498919	0.186604	0.217754	0.184039	0.129753	0.159428	0.0260391	0.118748	0.0919254	0.0699994	0.0426548	0.0263263	0.0284981	<LOQ	0.0147136	<LOQ	<LOQ	<LOQ	<LOQ	0.454983	0.0113963	0.00367847	0.00828981	0.00211218	0.00587039	0.993853	1.64561	1.14421	0.0102782	0.0307333	0.0182513	6.6494	8.3361	1.36372	1.30639	1.29684	1.17551	0.871651	<LOQ	0.596352	0.515314	0.461419	0.396488
Lamivudine	Antiretroviral	5	<LOQ	<LOQ	10.402	6.30198	3.12428	5.22428	3.32428	4.62418	5.10627	4.70422	4.21324	3.81422	3.26926	90.2542	12.9586	<LOQ	11.5268	10.9518	9.94083	8.82672	8.37808	32.5959	9.81823	0.296767	8.37295	6.60341	8.46364	153.35	157.252	200.139	17.1989	189.54	28.4503	239.146	418.453	52.7191	49.532	48.0268	42.8401	37.0632	<LOQ	23.9394	20.3075	18.9543	16.4392
Levofloxacin	Antibacterial	0.1	<LOQ	0.117978	2.79346	1.10401	0.522529	0.701418	0.832036	0.670404	1.06304	0.651488	0.613023	0.563137	0.508761	1.39574	0.873363	0.0258302	0.776057	0.124	0.65088	0.603668	0.563642	1.88365	1.09304	0.102857	0.717094	0.374568	0.657406	4.95046	6.3206	10.5209	1.22982	7.16113	2.32565	35.3632	35.0471	12.9033	12.8119	12.3451	11.8986	9.04713	1.10682	7.96346	6.10852	4.40428	3.75418
Lidocaine	Cardiac therapy	0.1	<LOQ	0.00775913	<LOQ	<LOQ	<LOQ	<LOQ	<LOQ	<LOQ	<LOQ	<LOQ	<LOQ	<LOQ	<LOQ	0.0776378	0.00539545	<LOQ	<LOQ	0.0012373	<LOQ	<LOQ	<LOQ	0.0075169	<LOQ	<LOQ	<LOQ	<LOQ	<LOQ	0.0319377	0.0409027	0.0721438	0.00715987	0.0897638	0.0151391	0.313625	0.548976	0.0707754	0.0654518	0.0502387	0.0363165	0.0095359	<LOQ	0.00504578	0.00351377	0.00195195	<LOQ
Loperamide	Antidiarrheal	0.5	2.59412	0.981882	45.209	22.6085	39.3101	23.1734	24.3146	23.1027	24.3289	22.7505	17.7128	13.3894	10.1894	153.524	20.8624	0.414544	14.4218	30.619	15.6686	12.2763	9.38433	65.3774	14.5208	10.1792	9.90872	20.7784	6.23785	183.388	198.928	253.116	17.2779	229.402	23.4582	199.622	262.035	105.118	103.295	102.486	99.2589	95.1227	16.5662	68.8474	64.391	59.521	54.497
Lorazepam	Psycholeptic	0.1	<LOQ	0.0207899	0.0116269	0.010055	<LOQ	0.00972179	0.0325927	0.0116075	0.0143402	0.0115132	0.00832219	0.00464429	0.00262093	0.0336912	0.00416999	<LOQ	0.00228113	0.0102106	0.00310211	0.00102106	<LOQ	0.0518847	0.00209306	<LOQ	0.0017762	<LOQ	0.00112634	0.153487	0.134109	0.145682	0.00542671	0.445619	0.00807708	0.944659	0.941678	0.0939976	0.0930099	0.0927387	0.0821904	0.0672681	<LOQ	0.0392546	0.0272622	0.0186341	0.0123424
Mefenamic acid	Antiinflammatory/Antirhumatic	0.1	0.25101	0.946371	1.2401	0.854297	0.678397	0.803272	0.688324	0.735179	0.256715	0.674018	0.643018	0.604018	0.546271	2.35625	1.09515	<LOQ	0.530038	0.269108	0.475469	0.42609	0.372779	0.312112	0.315412	0.146975	0.243257	0.292944	0.196046	6.59181	9.37854	8.1513	0.556262	5.6632	1.65983	11.6126	13.8712	6.33774	6.27788	6.01111	5.866	5.21386	0.465156	3.63424	3.31737	3.27425	2.74922
Methyldopa	Antihyprtensive	0.1	0.130086	0.120524	<LOQ	0.09909	0.0567176	0.0651303	0.387047	0.122401	0.0620216	0.0823988	0.0689326	0.0472062	0.0313201	0.307807	0.147377	<LOQ	0.0605377	<LOQ	0.0185377	0.00853769	<LOQ	0.228803	0.0888033	0.966716	0.0756691	0.100055	0.0688371	0.188028	0.265794	0.332464	0.15623	0.465993	0.298565	8.61552	7.24013	3.36152	3.30579	3.28221	2.97214	2.61009	0.110736	1.97478	1.38742	1.01634	0.757586
Miconazole	Antifungal	1	4.4992	2.33263	15.4654	7.26051	6.93852	6.92982	6.60657	6.63128	<LOQ	6.05417	5.61751	5.32234	4.91193	22.0693	7.0575	<LOQ	6.35171	0.579085	5.32085	4.91923	4.56782	13.9229	4.86167	2.12464	4.37526	0.804616	3.77687	19.2986	21.609	32.3171	9.63163	23.9634	12.271	52.3908	59.4676	20.4266	19.7263	19.2623	18.5288	15.246	2.9947	10.3266	8.05233	6.54828	5.87867
Moxifloxacin	Antibacterial	0.5	0.0605777	0.109853	1.79098	0.813005	0.509316	0.793835	1.05231	0.712336	1.37132	0.665568	0.600825	0.554232	0.510905	2.44144	1.08687	0.235877	0.873148	0.173032	0.764242	0.71964	0.670169	1.95583	1.15963	0.0756145	0.822783	0.152733	0.701898	2.47632	4.04322	3.28174	1.39092	3.27177	2.1346	21.5323	20.9695	11.9539	11.7087	11.0407	10.5199	9.84496	2.72216	7.42168	6.78488	6.29286	5.67667
Nalidixic acid	Antibacterial	0.1	<LOQ	<LOQ	0.119684	0.0688678	<LOQ	0.046489	0.0512446	0.0508972	0.476083	0.0907371	0.0625271	0.0405096	0.0368214	1.12034	0.0389921	<LOQ	0.0319921	0.0330598	0.03015	0.0274116	0.0233836	0.483215	0.0680327	<LOQ	0.0620327	<LOQ	0.0307374	1.05598	1.07136	1.12177	0.119962	1.31859	0.305074	5.4646	5.5701	1.88881	1.62977	1.42237	1.39096	1.28449	0.016889	0.750023	0.582474	0.321454	0.2782
Naproxen	Antiinflammatory/Antirhumatic	2	0.91239	1.0578	4.57122	2.87765	1.74911	2.65759	2.84783	2.7108	0.887339	2.08467	1.60787	1.41683	1.23908	4.13827	1.95399	<LOQ	1.70499	0.729334	1.42987	0.721184	0.56161	3.15225	1.2307	0.185022	0.833941	0.321434	0.750071	11.4843	8.31824	11.521	1.50409	21.4356	2.91485	48.2007	37.807	10.2691	10.254	10.1751	9.77184	9.373	2.15649	6.6821	6.0058	5.06857	4.46688
Nevirapine	Antiretroviral	5	10.316	12.424	80.1266	37.7682	27.1188	31.9603	68.9994	35.223	68.9213	37.3277	32.1394	27.8201	24.342	163.499	30.3552	<LOQ	24.762	20.3884	19.1564	16.7473	13.7904	107.1	20.4105	7.3575	16.1164	4.0927	10.2997	518.365	453.803	423.067	62.0418	707.18	81.7678	947.187	989.156	241.916	246.494	238.197	234.526	229.325	7.57146	169.609	160.478	148.413	142.889
Nifedipine	Calcium blocker	1	0.425167	0.591606	1.29759	0.76727	<LOQ	0.625594	1.7136	0.711503	1.46503	1.03375	0.759358	0.703976	0.663753	1.40531	0.827746	<LOQ	0.674894	0.215769	0.603415	0.569432	0.505256	1.36882	0.752012	<LOQ	0.700982	<LOQ	0.608912	3.20854	3.25356	2.85184	1.13664	3.42527	1.7155	4.38997	4.54736	2.1725	1.87632	1.42521	1.12868	0.741286	<LOQ	0.326669	0.271309	0.235287	0.697736
Ofloxacin	Antibacterial	4	2.67964	2.58276	3.18854	2.8566	<LOQ	2.38276	13.9111	3.07328	4.12328	3.12528	2.70322	2.31624	1.91728	4.2843	2.0543	<LOQ	1.4662	<LOQ	1.04424	0.644396	0.342296	20.8454	1.73376	2.27416	1.67416	3.4489	1.66071	73.8411	<LOQ	92.9698	5.79247	50.8098	10.4513	442.424	544.591	191.515	184.979	178.581	170.586	163.89	5.50092	103.248	85.2036	76.4022	71.9332
Omeprazole	Antacid	1	7.7797	9.38705	<LOQ	4.90978	22.4121	7.39963	18.257	11.6851	14.1222	12.1966	10.0154	8.66757	5.8722	11.7202	4.91653	<LOQ	3.82297	5.12179	4.09783	3.42631	3.06341	17.1544	4.84539	1.32621	4.0457	<LOQ	3.43123	23.6917	18.4441	26.3168	7.98224	43.6437	13.801	52.3801	44.3005	22.2893	21.8113	20.5781	18.6329	13.4328	2.65803	8.11156	6.52206	4.80943	4.31505
Oxazepam	Psycholeptic	0.5	0.303178	0.054857	0.17827	0.169048	0.0403764	0.164978	0.172844	0.165017	0.0900449	0.142768	0.127263	0.107561	0.0880088	0.643067	0.204308	<LOQ	0.184768	0.00387095	0.161862	0.138449	0.110609	0.584707	0.162535	0.14932	0.161312	0.0828177	0.154518	0.23241	0.213812	0.16707	0.16707	0.137706	0.167032	1.34118	1.26561	0.504091	0.509917	0.456382	0.417775	0.352202	0.0874175	0.235605	0.208111	0.182617	0.120875
Oxytetracycline	Antibacterial	2	0.849658	2.53362	4.88923	2.72725	2.71676	2.69187	2.28163	2.34109	2.29967	2.10567	2.0696	2.03819	2.01738	2.28954	2.08406	<LOQ	2.04381	<LOQ	2.00391	1.17094	1.14579	3.07838	1.16955	<LOQ	1.11055	<LOQ	1.05076	5.1721	4.87778	4.01727	1.28099	2.09164	1.29239	5.73327	4.89679	2.28528	2.19634	2.1684	2.14081	2.1008	0.153071	1.56062	1.21549	1.18317	1.30587
Paracetamol	Analgesic	10	70.4009	32.1345	438.793	233.991	111.115	189.521	162.303	175.874	131.204	146.897	137.372	128.299	119.922	912.392	257.187	15.1938	214.116	26.8027	178.323	167.708	120.802	807.443	207.343	17.9416	189.532	<LOQ	137.653	800.148	728.347	779.095	199.602	1508.89	234.261	5961.26	4280.29	2107.17	1951.59	1789.35	1899.45	1698.73	148.413	1121.94	947.876	849.315	822.042
Promethazine	Antihistaminic	1	<LOQ	<LOQ	0.274266	0.120327	<LOQ	0.0532787	<LOQ	0.034277	<LOQ	0.0216564	0.0133277	0.00850679	0.00517069	0.0159054	0.00447232	<LOQ	<LOQ	<LOQ	<LOQ	<LOQ	<LOQ	<LOQ	<LOQ	0.0404329	<LOQ	<LOQ	<LOQ	0.368337	0.334485	0.370413	0.0807031	0.155111	0.0907655	0.637216	0.565399	0.357482	0.34562	0.334812	0.30412	0.26106	0.00421269	0.204056	0.167753	0.117753	0.0626612
Propranolol	Beta Blocker	1	<LOQ	<LOQ	0.736974	0.285502	0.0947498	0.22475	0.128892	0.161713	0.146635	0.152635	0.116334	0.074755	0.0435337	0.273103	0.098452	<LOQ	0.0914654	0.0415613	0.0802324	0.0698297	0.0367132	0.320427	0.0417703	<LOQ	0.0402109	0.0772669	0.0431707	1.16661	2.14574	1.77426	0.101343	1.00004	0.20035	1.28471	1.1554	0.680794	0.670065	0.630973	0.594156	0.545342	<LOQ	0.386472	0.354297	0.325127	0.279386
Pyrazinamide	Antimicobacterial	0.1	0.328111	0.12413	1.63025	0.647325	0.417476	0.537672	1.30963	0.721933	0.539431	0.682398	0.642632	0.62108	0.581531	4.97358	1.5002	<LOQ	1.02238	0.492836	0.626476	0.591826	0.567215	2.3914	1.01962	<LOQ	0.727762	0.317816	0.673823	31.7972	32.2836	37.1424	2.27525	28.5274	3.84424	58.4508	54.9524	17.4665	17.0718	17.0413	15.2812	13.1756	0.874902	8.56561	7.32078	6.89027	6.42424
Sulfadiazine	Antibacterial	0.1	0.0299167	0.0349478	0.0179017	0.0234381	0.0137718	0.0214871	0.00612837	0.0159447	0.0203453	0.0166164	0.0136607	0.010276	0.00954587	0.124196	0.0100416	<LOQ	0.0091899	0.00572742	0.00858833	0.00674944	0.0056849	0.0237252	0.00647632	0.0299769	0.00718879	0.0254368	0.0102829	0.130688	0.12599	<LOQ	0.0224156	0.0820217	0.0311821	0.915317	0.929856	0.128135	0.101164	0.109829	0.102976	0.0934299	0.0147606	0.0609715	0.0418546	0.0320654	0.0276552
Sulfamethoxazole	Antibacterial	5	17.9023	21.8216	116.941	60.6543	25.7842	54.9699	20.4415	47.2611	14.5836	39.0985	34.7386	30.8122	26.0531	67.6337	39.5838	<LOQ	30.6878	2.71456	22.772	17.635	14.4553	92.5619	22.1815	17.7349	17.3926	10.1748	12.0035	73.0342	93.096	99.2244	25.9396	133.268	42.921	214.256	295.175	114.36	111.331	109.947	108.759	103.116	5.35459	72.3609	52.2089	39.0662	43.6984
Telmisartan	Angiotensive	0.1	0.289965	0.314899	0.376183	0.318091	0.517118	0.314556	0.4402	0.308428	0.167405	0.223143	0.17785	0.138113	0.0815335	0.131411	0.0712384	<LOQ	0.027227	0.167778	0.0346796	0.0149916	<LOQ	0.253976	0.0203758	0.212202	0.0365083	<LOQ	<LOQ	1.24475	1.75683	1.08762	0.638305	1.3184	0.864476	3.42929	2.64634	1.61598	1.60221	1.5984	1.53607	1.23744	0.400635	0.804948	0.753213	0.702388	0.631905
Terbutaline	Obstructive airway	2	1.04462	1.53447	13.2247	5.21138	2.91547	4.55932	1.735	4.07949	2.62126	3.51922	2.80222	2.30112	1.84589	3.23247	2.17234	<LOQ	1.90285	0.420766	1.32029	1.03598	0.899868	2.85209	1.35209	<LOQ	1.2152	<LOQ	0.852873	4.28002	3.17255	5.74793	1.30807	4.45573	2.13116	7.09326	8.33398	3.48653	3.21813	3.1528	3.00204	2.81256	<LOQ	1.86232	0.846812	0.74881	1.97277
Tetracycline	Antibacterial	5	83.4834	19.887	98.6208	71.3624	31.8529	63.2986	86.5345	67.7005	49.1973	58.9475	53.554	49.2223	45.2606	241.439	85.6615	<LOQ	79.9281	113.763	79.2632	74.4183	70.8509	227.063	74.4964	<LOQ	66.8128	85.2236	65.419	278.172	246.134	174.643	99.0227	179.432	107.632	322.586	369.842	181.002	179.455	175.92	170.274	164.958	33.7212	124.415	119.673	113.037	106.627
Triclosan	Medicated dressing	20	41.2427	31.2885	152.847	84.0837	61.3297	77.3203	97.8177	79.7587	58.7354	70.395	65.7668	62.5478	57.238	325.694	98.2456	11.0416	89.8416	95.0281	90.1291	88.5223	86.7353	172.514	104.135	49.2232	91.4435	71.8243	86.7474	289.045	252.365	395.551	105.98	224.176	136.313	431.866	246.08	205.264	204.185	203.666	198.705	192.501	102.345	151.142	145.433	138.998	129.934
Zidovudine	Antiretroviral	10	7.37902	9.80679	13.5325	10.8518	29.2057	11.248	41.3003	20.5051	55.0063	30.4215	28.2611	25.5633	21.0592	107.429	35.7769	3.4286	28.5921	6.66311	22.9322	19.3217	17.8412	113.17	35.5263	9.3371	27.1032	7.28878	20.87	218.911	158.972	211.488	32.6468	245.464	53.0925	777.158	674.496	107.768	106.877	105.974	101.542	94.3698	34.7169	71.999	67.5712	62.2693	57.1196
	LOQ is the limit of quantification		N: samples from the river (26 sites)
			T: tributary (10 sites)
			C: Channels and drainages (9 sites)
