# Supplementary material
Source: Research Square preprint supplement (doi:10.21203/rs.3.rs-9883112/v1)
Supplement: Supplementary file 3 [file b6939629f7bc194d6d33557f.xlsx]

## Sheet: Sheet1
	Table S5 Raw data of detected pharmaceuticals (ng/l) at the sampling sites N21 of the Nyabugogo river at different time of the day and for 5 consecutive days
				Monday			Tuesday			Wednesday			Thursday			Friday		Average			STDEV			RSD
				Day 1			Day 2			Day 3			Day 4			Day5
Therapeutic group	Compound	LOQ	8:AM	1: PM	5:PM	8:AM	1: PM	5:PM	8:AM	1: PM	5:PM	8:AM	1: PM	5:PM	8:AM	1: PM	5:PM	8:AM	1: PM	5:PM	8:AM	1: PM	5:PM	8:AM	1: PM	5:PM
Antiretroviral	Abacavir	2	208.031	168.757	204.626	154.202	65.4425	98.6402	179.775	74.552	107.771	150.892	96.7375	111.286	186.499	93.1258	184.626	165.049	102.633	156.432	23.7482	40.7026	49.3258	0.143886	0.396586	0.315317
Antiretroviral	Aciclovir	0.1	11.4586	4.81777	9.87491	11.8514	5.29741	6.29182	15.009	8.2129	10.9912	13.9493	5.00701	12.9621	16.7116	11.7327	13.4833	12.0075	8.60459	11.4706	2.19319	2.97917	2.87486	0.182651	0.346231	0.25063
Antihelminthic	Albendazole	2	2080.46	1069.13	1863.18	1729.76	1103.09	1506.07	1367.99	866.764	1224.15	1153.77	506.148	1095.21	2041.32	1469.85	1751.82	1545.13	1120.81	1677.31	408.512	352.76	329.617	0.264386	0.314738	0.196516
Antimicobacterial	Aminosalicylic acid	0.5	142.347	67.7399	122.882	75.9373	41.4446	70.5607	127.777	60.3354	90.9253	112.773	57.4915	87.6758	147.222	95.6349	115.876	110.155	70.5661	109.493	28.6677	19.8613	21.4906	0.260248	0.281457	0.196273
Calcium blocker	Amlodipine besylate	1	26.1199	10.7812	18.778	23.6534	11.5537	13.0809	17.2854	11.118	13.3304	14.6516	12.3747	14.2564	22.8811	15.6836	20.959	20.4629	12.6786	17.8059	4.766	1.98212	3.56944	0.232909	0.156336	0.200464
Antibacterial	Amoxicillin	5	218.36	123.7	216.776	197.471	117.828	164.667	218.017	72.2437	139.5	221.231	99.7949	203.816	226.603	93.3991	218.43	192.049	122.197	193.195	11.0928	20.5175	34.9958	0.0577601	0.167904	0.181142
Antiretroviral	Atazanavir	7	200.702	131.223	171.307	169.475	80.6503	153.881	235.177	67.6565	157.221	256.148	85.5491	191.79	229.14	126.673	166.65	184.008	119.598	175.64	33.646	28.7317	14.9509	0.18285	0.240235	0.0851223
Beta Blocker	Atenolol	5	24.7224	12.9842	10.7054	22.6405	6.10335	16.9913	17.6968	7.11771	14.8533	20.6462	5.55888	14.9367	25.3847	7.23648	18.2717	19.2006	9.6757	17.2413	3.1381	2.98162	2.87333	0.163437	0.308155	0.166654
Psychoanaleptic	Caffeine	10	208.372	71.4269	116.629	158.621	53.968	137.303	102.552	71.8508	81.9856	140.685	84.3695	96.5846	188.387	72.0162	129.007	148.46	73.1693	130.662	41.2935	10.8443	22.8526	0.278145	0.148209	0.174898
Antiepileptic	Carbamazepine	1	24.0739	18.4005	22.9729	23.3579	14.7904	19.7258	20.3605	11.844	16.1313	19.7507	10.1717	15.2825	26.9416	17.3398	21.6344	20.9811	15.5314	21.4812	2.92785	3.50537	3.36115	0.139547	0.225695	0.156469
Antihistaminic	Cetirizine	5	3.10957	1.67042	3.09567	2.86714	1.7185	2.32511	3.32729	0.816233	1.44941	2.79137	1.21445	2.14162	2.7928	1.92902	2.6452	2.66225	1.65516	2.46164	0.234912	0.448703	0.611668	0.0882381	0.271093	0.24848
Antihistaminic	Chlorpheniramine	1	16.3702	3.90211	14.3118	15.8795	8.04417	13.202	23.3458	11.0893	15.911	15.889	9.01954	10.7393	25.0255	15.6028	16.1501	17.9281	9.87555	16.9201	4.50188	4.28521	2.21479	0.251107	0.433922	0.130897
Antibacterial	Ciprofloxacin	10	130.739	92.1142	106.567	132.942	39.7446	78.1208	118.288	85.2236	115.843	136.021	82.6277	129.854	132.215	54.0487	128.131	119.362	80.197	112.175	6.84668	22.6233	21.0393	0.0573604	0.282097	0.187557
Antibacterial	Clarithromycin	1	306.688	112.432	203.431	242.114	106.584	204.091	173.426	63.34	121.484	172.266	50.0318	87.5062	256.371	111.799	148.919	205.726	96.3322	186.859	57.5694	29.8114	51.1197	0.279835	0.309464	0.273573
Stomatological drug	Clotrimazole	1	240.252	90.0378	139.012	156.681	68.8135	129.124	118.836	78.3265	99.3302	150.758	81.4351	148.152	197.329	102.614	137.229	158.907	97.5889	140.405	46.9288	12.7676	18.7268	0.295323	0.13083	0.133377
Antibacterial	Cloxacillin	1	184.174	65.0386	106.377	164.984	34.8564	115.367	126.233	42.4399	102.058	94.1366	52.3099	83.9275	150.761	108.906	131.316	135.692	67.0336	121.176	35.007	29.2161	17.4294	0.257989	0.435842	0.143836
Antiretroviral	Darunavir	5	6.32024	3.79092	5.61596	7.21452	2.50126	6.61206	4.077	3.36333	3.727	7.32501	4.90603	5.24674	8.2364	2.95307	3.34738	6.15084	3.57106	5.50776	1.58263	0.918804	1.35555	0.257304	0.257291	0.246116
Stomatological drug	Dexamethazone	0.5	23.1077	14.5513	18.6817	20.0399	12.25	13.854	27.6444	15.9816	20.5155	23.7293	10.9529	14.3379	25.4025	15.4566	18.8275	21.4295	14.5155	19.4562	2.81954	2.15461	2.96711	0.131573	0.148435	0.152502
Psycholeptic	Diazepam	4	29.2487	15.6478	21.2632	26.5508	10.2607	11.5073	26.5775	15.109	18.2402	27.813	8.09717	15.9942	37.22	17.8487	25.9626	25.5388	14.9721	22.8387	4.46502	4.054	5.4435	0.174832	0.270771	0.238345
Antiinflammatory/Antirhumatic	Diclofenac	2	35.3426	17.9513	33.9019	33.4976	18.0226	26.0768	38.2934	15.4543	25.9628	27.4271	12.822	20.0851	42.9663	14.7197	24.4176	32.5844	17.2466	30.6651	5.76095	2.22052	4.99744	0.176801	0.128751	0.162969
Calcium blocker	Diltiazem	0.5	1.76405	0.43078	0.85099	0.982229	0.511208	0.651068	1.30889	0.595455	0.925142	1.22056	0.431716	0.550818	2.56852	1.26014	1.58865	1.41108	0.669681	1.31687	0.62659	0.350047	0.406286	0.444049	0.522707	0.308523
Antiretroviral	Efavirenz	2	157.191	77.7794	128.464	142.739	53.0337	141.034	118.706	69.4612	97.0005	96.1586	72.9194	90.174	166.39	71.4361	162.074	131.589	72.3769	138.992	28.741	9.40053	30.1352	0.218415	0.129883	0.216812
Antimicobacterial	Ethambutol hydrochloride	1	160.963	60.6672	146.723	110.435	64.3537	89.0605	148.487	66.5193	111.473	133.998	55.9564	74.4663	173.317	70.4749	110.318	129.832	67.2963	126.178	24.4112	5.55383	27.3287	0.188022	0.082528	0.216588
Antihistaminic	Fexofenadine	0.1	31.2265	8.90807	23.2866	18.1795	7.10166	10.5487	14.6637	8.01536	13.0018	13.442	10.4351	10.6829	25.4554	8.71592	19.7599	19.992	8.68479	18.4105	7.56359	1.23049	5.76041	0.378331	0.141683	0.312888
Psycholeptic	Haloperidol	0.1	0.477728	0.364968	0.452825	0.472723	0.260929	0.309671	0.89261	0.479731	0.812673	0.941593	0.756849	0.875506	0.955064	0.721803	0.944831	0.710995	0.540587	0.695013	0.250045	0.217685	0.280494	0.351683	0.402682	0.403582
Antiinflammatory/Antirhumatic	Ibuprofen	5	72.1991	38.9871	43.8657	56.7622	32.1208	46.8106	48.3699	40.1465	42.6149	51.4889	29.4032	43.4364	55.0336	36.2956	53.1868	52.3536	38.1973	48.3023	9.21308	4.55282	4.32702	0.175978	0.119192	0.089582
Angiotensive	Irbesartan	0.5	77.1261	28.5504	34.9114	74.8594	33.6468	50.208	68.5005	16.4655	38.5335	95.268	69.9282	83.7007	103.152	41.4261	102.13	78.7132	40.7579	65.7869	14.7017	20.0195	29.6006	0.186776	0.491182	0.449947
Antimicobacterial	Isoniazid	2	98.9759	74.1584	98.569	124.525	50.8314	74.0619	110.852	65.0687	106.345	83.3755	66.8799	82.0926	122.137	86.382	100.886	104.674	71.7066	100.4	17.0944	13.0214	13.6662	0.163311	0.181593	0.136118
Anesthetic	Ketamine	0.1	6.8285	3.54241	4.28806	6.20294	2.10729	3.81826	4.819	2.84118	3.43234	4.01941	1.21717	1.79481	4.49816	1.15569	2.60115	4.71315	2.28827	3.72759	1.18978	1.03375	0.994035	0.252439	0.451762	0.266669
Antiretroviral	Lamivudine	5	48.0306	20.9964	44.2861	31.0523	14.2758	20.497	23.2563	16.3532	18.8182	13.1896	9.7112	11.0065	40.3964	16.822	21.6836	30.4894	15.8908	29.1362	13.7417	4.11122	12.4709	0.450705	0.258717	0.42802
Antibacterial	Levofloxacin	0.1	26.2052	17.764	20.8431	16.6063	9.91006	13.75	20.988	6.94741	9.01183	19.4261	7.42354	10.1683	19.9389	10.8517	14.153	18.2324	11.1283	15.5393	3.5117	4.33852	4.62649	0.192608	0.389865	0.297728
Cardiac therapy	Lidocaine	0.1	0.361361	0.042643	0.215399	0.0604887	0.0358114	0.050573	0.0836704	0.0415034	0.0436501	0.0602868	0.0323548	0.0499854	0.0667952	0.03711	0.0528845	0.120934	0.0414106	0.0858604	0.131625	0.00421947	0.0743726	1.0884	0.101893	0.866204
Antidiarrheal	Loperamide	0.5	173.305	74.2244	104.191	106.658	68.9644	99.0092	96.106	45.8449	86.6428	88.3068	52.3699	76.1495	159.642	53.3109	115.358	117.616	63.6988	112.969	38.8937	12.0461	15.2653	0.330683	0.18911	0.135128
Psycholeptic	Lorazepam	0.1	1.40176	0.783888	1.02222	1.06016	0.582107	0.800511	2.14808	0.114858	0.734135	0.849467	0.294889	0.346517	1.33596	0.471976	1.00612	1.24817	0.459869	0.979788	0.493441	0.257776	0.273959	0.395332	0.560543	0.279611
Antiinflammatory/Antirhumatic	Mefenamic acid	0.1	8.92638	5.38347	6.55449	6.68784	4.71621	5.46225	8.06553	7.63864	6.65123	9.07333	5.22182	7.01583	7.55861	4.44791	5.26093	7.29203	5.84041	6.2975	0.988898	1.26336	0.777875	0.135614	0.216313	0.123521
Antihyprtensive	Methyldopa	0.1	8.40717	3.72666	7.33012	6.84194	3.0381	4.74564	7.56147	5.20165	6.3513	8.59198	2.89738	6.73036	7.24626	4.94087	6.968	6.59084	4.72753	6.52826	0.75044	1.06505	1.00412	0.113861	0.225286	0.153811
Antifungal	Miconazole	1	41.5201	24.2816	34.2282	31.2063	20.3517	23.2269	16.381	13.1739	15.3611	34.5353	15.7215	27.3068	32.8675	22.9194	31.0457	27.5393	21.6067	27.3459	9.219	4.72644	7.33951	0.334758	0.218749	0.268395
Antibacterial	Moxifloxacin	0.5	22.064	9.36571	15.9244	19.2971	9.15686	13.3988	21.5843	9.17514	12.0436	12.8024	8.65012	9.44369	23.073	10.7868	14.3299	18.9337	9.58565	15.7539	4.1302	0.805117	2.45141	0.21814	0.0839919	0.155606
Antibacterial	Nalidixic acid	0.1	3.65799	0.826803	1.82615	0.71791	0.368336	0.493067	3.05587	0.801192	1.46162	3.24496	0.364026	1.1977	3.4311	0.521471	2.96271	2.24538	0.743101	2.03493	1.19694	0.226188	0.910183	0.533068	0.304384	0.44728
Antiinflammatory/Antirhumatic	Naproxen	2	30.7661	13.1892	25.0969	28.3971	7.96883	16.5939	21.5066	8.0483	14.3979	20.6326	7.82824	11.8723	23.286	9.88385	15.2022	22.3568	10.1925	18.9154	4.44324	2.28784	5.03357	0.198742	0.224463	0.266109
Antiretroviral	Nevirapine	5	321.199	172.364	274.145	274.036	127.547	245.858	212.698	135.827	193.23	217.042	148.207	195.324	306.854	191.202	266.095	252.599	164.453	257.236	50.0446	26.3604	38.5228	0.198119	0.160291	0.149756
Calcium blocker	Nifedipine	1	2.47915	1.7188	2.29059	2.01186	0.89295	1.64596	2.43684	1.44496	2.11834	2.10011	0.769224	1.2828	3.19246	2.31713	3.0588	2.17791	1.53133	2.46123	0.465423	0.631598	0.675977	0.213702	0.412451	0.27465
Antibacterial	Ofloxacin	4	395.782	194.051	262.409	216.789	134.059	210.092	306.701	138.542	241.883	184.86	108.083	138.677	348.232	158.153	245.774	275.117	152.697	261.678	88.4208	31.9796	49.1249	0.321393	0.209432	0.187731
Antacid	Omeprazole	1	30.6575	15.4582	22.1184	21.5424	9.96051	10.2807	21.0573	12.1162	19.9694	26.8454	9.17781	18.0529	23.0676	10.5472	17.7459	21.1005	13.227	18.6364	4.06128	2.48525	4.4672	0.192473	0.187892	0.239703
Psycholeptic	Oxazepam	0.5	2.64467	1.20816	2.30738	1.46753	0.399095	0.74059	0.935955	0.484322	0.882226	1.22569	0.656232	0.951848	2.38946	1.02061	2.32847	1.61877	0.812808	1.72962	0.745853	0.34842	0.803161	0.460754	0.428663	0.464356
Antibacterial	Oxytetracycline	2	4.36565	2.60194	2.89797	3.01166	1.62693	1.79779	3.99918	2.20188	2.99488	3.23751	1.80175	3.12147	4.23315	2.84203	3.23296	3.48228	2.47885	3.03135	0.608369	0.5147	0.579308	0.174704	0.207636	0.191105
Analgesic	Paracetamol	10	1943.97	1047.74	1813.25	1254.49	887.621	1000.41	1172.87	592.367	1052.79	865.031	418.801	675.026	2089.05	889.178	1888.96	1375.84	818.386	1568.89	526.419	254.965	536.376	0.382618	0.311546	0.341882
Antihistaminic	Promethazine	1	1.09644	0.0995411	0.381241	0.588451	0.0872092	0.381424	0.647301	0.182781	0.337376	0.333856	0.136286	0.283981	0.692759	0.0903539	0.162607	0.632246	0.148773	0.391081	0.275004	0.0405478	0.0912766	0.434963	0.272547	0.233395
Beta Blocker	Propranolol	1	3.14272	1.91759	2.80042	2.15571	1.25795	2.08037	1.93958	0.789148	1.67591	2.62609	0.521891	1.83946	3.12199	1.79927	2.33486	2.17638	1.52068	2.40271	0.547997	0.610267	0.442491	0.251793	0.401311	0.184163
Antimicobacterial	Pyrazinamide	0.1	40.4341	30.0893	36.2556	32.5048	21.6838	27.5102	37.8399	15.4107	24.4554	30.4453	15.9413	28.1463	36.8185	22.604	35.335	32.7077	23.5868	32.0749	4.06269	5.96618	5.18153	0.124212	0.252945	0.161544
Antibacterial	Sulfadiazine	0.1	0.819841	0.319653	0.734767	0.326654	0.10502	0.0199609	0.410651	0.100614	0.05	0.260039	0.189971	0.227624	0.810332	0.514828	0.0701258	0.51149	0.253548	0.337037	0.269706	0.174531	0.298505	0.527295	0.688357	0.885673
Antibacterial	Sulfamethoxazole	5	269.721	129.821	211.562	212.449	108.126	154.994	213.728	113.187	229.638	206.748	114.873	141.502	236.358	153.144	185.743	209.426	129.156	203.659	26.0165	18.271	37.0494	0.124228	0.141465	0.181919
Angiotensive	Telmisartan	0.1	3.75043	2.59799	3.27582	3.41909	2.08822	2.11667	3.60872	1.00009	1.19011	3.15918	0.759423	1.52726	3.81879	1.50477	2.99876	3.07129	1.74367	2.68003	0.267271	0.759833	0.904497	0.0870225	0.435768	0.337495
Obstructive airway	Terbutaline	2	11.0613	4.62025	5.64681	3.14177	2.01063	2.33409	7.31208	2.46684	3.71319	9.05181	6.88782	8.82451	6.95519	2.86057	4.01216	7.07163	4.15656	4.53229	2.93331	2.00402	2.48697	0.414799	0.482134	0.548722
Antibacterial	Tetracycline	5	215.271	134.525	204.673	189.359	125.419	138.744	175.103	96.7067	156.957	190.991	186.017	133.984	231.98	172.502	212.06	199.546	132.628	188.883	22.7414	36.2106	36.7861	0.113965	0.273025	0.194756
Medicated dressing	Triclosan	20	287.358	126.402	229.432	187.232	122.387	157.808	220.764	109.278	151.518	253.28	141.947	196.527	274.597	148.293	197.049	222.38	140.578	202.081	40.8125	15.6291	32.0233	0.183526	0.111178	0.158468
Antiretroviral	Zidovudine	10	275.925	137.819	221.334	239.594	72.9181	103.71	264.71	98.3447	138.108	224.101	84.181	121.787	270.094	84.0832	129.116	226.901	102.99	172.472	22.0905	25.3347	45.6792	0.0973577	0.245991	0.264849
				LOQ is limit of quantification
