# Supplementary material
Source: Research Square preprint supplement (doi:10.21203/rs.3.rs-9883112/v1)
Supplement: Supplementary file 4 [file c24e087b4d59c86b437f88cc.xlsx]

## Sheet: P values within day
		Table S6 P- values from ANOVA to compare the concentration variations (ng/l) of top pharmaceuticals detected at site N21 of the Nyabugogo River within a day ( 8. a.m, 1 pm, and 5 p.m)
		08:00:00	day1	day2	day3	day4	day5	13:00:00	day1	day2	day3	day4	day5	17:00:00	day1	day2	day3	day4	day5
		Albendazole	2080.46	1729.76	1367.99	1153.77	2041.32		1069.13	1103.09	866.764	506.148	1469.85		1863.18	1506.07	1224.15	1095.21	1751.82
		Amoxicillin	218.36	197.471	218.017	221.231	226.603		123.7	117.828	72.2437	99.7949	93.3991		216.776	164.667	139.5	203.816	218.43
		Atazanavir	200.702	169.475	235.177	256.148	229.14		131.223	80.6503	67.6565	85.5491	126.673		171.307	153.881	157.221	191.79	166.65
		Nevirapine	321.199	274.036	212.698	217.042	306.854		172.364	127.547	135.827	148.207	191.202		274.145	245.858	193.23	195.324	266.095
		Ofloxacin	395.782	216.789	306.701	184.86	348.232		194.051	134.059	138.542	108.083	158.153		262.409	210.092	241.883	138.677	245.774
		Paracetamol	1943.97	1254.49	1172.87	865.031	2089.05		1047.74	887.621	592.367	418.801	889.178		1813.25	1000.41	1052.79	675.026	1888.96
		Sulfamethoxazole	269.721	212.449	213.728	206.748	236.358		129.821	108.126	113.187	114.873	153.144		211.562	154.994	229.638	141.502	185.743
		Tetracycline	215.271	189.359	175.103	190.991	231.98		134.525	125.419	96.7067	186.017	172.502		204.673	138.744	156.957	133.984	212.06
		Triclosan	287.358	187.232	220.764	253.28	274.597		126.402	122.387	109.278	141.947	148.293		229.432	157.808	151.518	196.527	197.049
		Zidovudine	275.925	239.594	264.71	224.101	270.094		137.819	72.9181	98.3447	84.181	84.0832		221.334	103.71	138.108	121.787	129.116
		Albendazole	8am	1pm	5pm
			2080.46	1069.13	1863.18
	Top 10 pharmaceuticals		1729.76	1103.09	1506.07				SUMMARY
			1367.99	866.764	1224.15				Groups	Count	Sum	Average	Variance
			1153.77	506.148	1095.21				Column 1	5	8373.29	1674.66	166882
			2041.32	1469.85	1751.82				Column 2	5	5014.98	1003	124440
									Column 3	5	7440.43	1488.09	108648
									Column 1	5	8373.29	1674.66	166882
									ANOVA
									Source of Variation	SS	df	MS	F	P-value	F crit
									Between Groups	1.20209e+06	2	601044	4.50817	0.0346534	3.88529
									Column 1	5	8373.29	1674.66	166882
									Total	2.80197e+06	14
			8am	1pm	5pm				Anova: Single Factor
		Amoxicillin	218.36	123.7	216.776				Column 1	5	8373.29	1674.66	166882
			197.471	117.828	164.667				SUMMARY
			218.017	72.2437	139.5				Groups	Sum	Average	Variance
			221.231	99.7949	203.816				Column 1	1081.68	216.336	123.05
			226.603	93.3991	218.43			Triclosan	Column 1	5	8373.29	1674.66	166882
									Column 2	5	943.189	188.638	1224.71
									Column 3
								Zidovudine	Column 1	5	8373.29	1674.66	166882
									Source of Variation	SS	df	MS	F	P-value	F crit
									Between Groups	35984.6	2	17992.3	30.5174	1.96746e-05	3.88529
									Within Groups	7074.9	12	589.575
			1069.13	1103.09	866.764	506.148	1469.85		Total	43059.5	14
			123.7	117.828	72.2437	99.7949	93.3991
			131.223	80.6503	67.6565	85.5491	126.673	Atazanavir	Anova: Single Factor
			172.364	127.547	135.827	148.207	191.202
			169.475	80.6503	153.881				SUMMARY
			235.177	67.6565	157.221				Groups	Count	Sum	Average	Variance
			256.148	85.5491	191.79				Column 1	5	1081.68	216.336	123.05
			229.14	126.673	166.65				Column 2	5	506.966	101.393	420.966
									Column 3	5	943.189	188.638	1224.71
									ANOVA
									Source of Variation	SS	df	MS	F	P-value	F crit
									Between Groups	35984.6	2	17992.3	30.5174	1.96746e-05	3.88529
									Within Groups	7074.9	12	589.575
									Total	43059.5	14
		Nevirapine					Nevirapine	Anova: Single Factor
			321.199	172.364	274.145
			274.036	127.547	245.858			SUMMARY
			212.698	135.827	193.23			Groups	Count	Sum	Average	Variance
			217.042	148.207	195.324			Column 1	5	1331.83	266.366	2504.46
			306.854	191.202	266.095			Column 2	5	775.147	155.029	694.871
								Column 3	5	1174.65	234.93	1484
								ANOVA
								Source of Variation	SS	df	MS	F	P-value	F crit
								Between Groups	32946.8	2	16473.4	10.5524	0.00226854	3.88529
								Within Groups	18733.3	12	1561.11
								Total	51680.2	14
		Ofloxacin					Ofloxacin	Anova: Single Factor
			395.782	194.051	262.409
			216.789	134.059	210.092			SUMMARY
			306.701	138.542	241.883			Groups	Count	Sum	Average	Variance
			184.86	108.083	138.677			Column 1	5	1452.36	290.473	7818.24
			348.232	158.153	245.774			Column 2	5	732.889	146.578	1022.69
								Column 3	5	1098.83	219.767	2413.26
								ANOVA
								Source of Variation	SS	df	MS	F	P-value	F crit
								Between Groups	51769.5	2	25884.7	6.90003	0.0101243	3.88529
								Within Groups	45016.8	12	3751.4
		Paracetamol	1943.97	1047.74	1813.25			Anova: Single Factor
			1254.49	887.621	1000.41
			1172.87	592.367	1052.79			SUMMARY
			865.031	418.801	675.026			Groups	Count	Sum	Average	Variance
			2089.05	889.178	1888.96			Column 1	5	7325.41	1465.08	277117
			t-Test: Paired Two Sample for Means					Column 2	5	3835.7	767.141	65007.2
								Column 3	5	6430.43	1286.09	287699
				Variable 1	Variable 2
			Mean	1465.08	767.141
			Variance	277117	65007.2			ANOVA
			Observations	5	5			Source of Variation	SS	df	MS	F	P-value	F crit
			Pearson Correlation	0.829321				Between Groups	1.31411e+06	2	657054	3.12971	0.0480569	3.88529
			Hypothesized Mean Difference	0				Within Groups	2.5193e+06	12	209941
			df	4
			t Stat	4.51453				Total	3.8334e+06	14
		Tetracycline	P(T<=t) one-tail	0.00535147
			t Critical one-tail	2.13185				Anova: Single Factor
			P(T<=t) two-tail	0.0107029
			t Critical two-tail	2.77645				SUMMARY
			190.991	186.017	133.984			Groups	Count	Sum	Average	Variance
			231.98	172.502	212.06			Column 1	5	1002.7	200.541	517.169
								Column 2	5	715.171	143.034	1311.21
								Column 3	5	846.418	169.284	1353.22
								ANOVA
								Source of Variation	SS	df	MS	F	P-value	F crit
								Between Groups	8288.42	2	4144.21	3.90767	0.0493262	3.88529
								Within Groups	12726.4	12	1060.53
								Total	21014.8	14
		Triclosan
			287.358	126.402	229.432		Triclosan	Anova: Single Factor
			187.232	122.387	157.808
			220.764	109.278	151.518			SUMMARY
			253.28	141.947	196.527			Groups	Count	Sum	Average	Variance
			274.597	148.293	197.049			Column 1	5	1223.23	244.646	1665.66
								Column 2	5	648.308	129.662	244.27
								Column 3	5	932.334	186.467	1025.49
								ANOVA
								Source of Variation	SS	df	MS	F	P-value	F crit
								Between Groups	33055.3	2	16527.7	16.8913	0.000324254	3.88529
								Within Groups	11741.7	12	978.472
								Total	44797	14
		Zidovudine
			275.925	137.819	221.334			Anova: Single Factor
			239.594	72.9181	103.71
			264.71	98.3447	138.108			SUMMARY
			224.101	84.181	121.787			Groups	Count	Sum	Average	Variance
			270.094	84.0832	129.116			Column 1	5	1274.42	254.885	487.992
								Column 2	5	477.346	95.4692	641.847
								Column 3	5	714.055	142.811	2086.59
								ANOVA
								Source of Variation	SS	df	MS	F	P-value	F crit
								Between Groups	67025.3	2	33512.6	31.2576	1.74429e-05	3.88529
								Within Groups	12865.7	12	1072.14
								Total	79891	14
		Sulfamethoxazole						Anova: Single Factor
			269.721	129.821	211.562
			212.449	108.126	154.994			SUMMARY
			213.728	113.187	229.638			Groups	Count	Sum	Average	Variance
			206.748	114.873	141.502			Column 1	5	1139	227.801	676.858
			236.358	153.144	185.743			Column 2	5	619.15	123.83	333.829
								Column 3	5	923.439	184.688	1372.66
								ANOVA
								Source of Variation	SS	df	MS	F	P-value	F crit
								Between Groups	27287.2	2	13643.6	17.1736	0.000301261	3.88529
								Within Groups	9533.39	12	794.449
								Total	36820.5	14
			P value <0.05 means that the difference is statistically significant
			P-value>0.05 means that the difference is not statistically not significant

## Sheet: p values between days
		Table S6 P- values from ANOVA to compare the concentration variations of top 10 pharmaceuticals detected at site N21 of the Nyabugogo River between days
								Albendazole	Day 1	Day 2	Day 3	Day 4	Day 5
								8am	2080.46	1729.76	1367.99	1153.77	2041.32
								1pm	1069.13	1103.09	866.764	506.148	1469.85
								5pm	1863.18	1506.07	1224.15	1095.21	1751.82
	P value <0.05 means that the difference is statistically significant								Day 1	Day 2	Day 3	Day 4	Day 5
	P-value>0.05 means that the difference is not statistically not significant								218.36	197.471	218.017	221.231	226.603
									123.7	117.828	72.2437	99.7949	93.3991
									216.776	164.667	139.5	203.816	218.43
								Atazanavir	Day 1	Day 2	Day 3	Day 4	Day 5
									200.702	169.475	235.177	256.148	229.14
									131.223	80.6503	67.6565	85.5491	126.673
									171.307	153.881	157.221	191.79	166.65
								Nevirapine	Day 1	Day 2	Day 3	Day 4	Day 5
									321.199	274.036	212.698	217.042	306.854
									172.364	127.547	135.827	148.207	191.202
									274.145	245.858	193.23	195.324	266.095
								Ofloxacin	Day 1	Day 2	Day 3	Day 4	Day 5
									395.782	216.789	306.701	184.86	348.232
									194.051	134.059	138.542	108.083	158.153
									262.409	210.092	241.883	138.677	245.774
								Paracetamol	Day 1	Day 2	Day 3	Day 4	Day 5
									1943.97	1254.49	1172.87	865.031	2089.05
									1047.74	887.621	592.367	418.801	889.178
									1813.25	1000.41	1052.79	675.026	1888.96
								Sulfamethoxazole	Day 1	Day 2	Day 3	Day 4	Day 5
									269.721	212.449	213.728	206.748	236.358
									129.821	108.126	113.187	114.873	153.144
									211.562	154.994	229.638	141.502	185.743
								Tetracycline	Day 1	Day 2	Day 3	Day 4	Day 5
									215.271	189.359	175.103	190.991	231.98
									134.525	125.419	96.7067	186.017	172.502
									204.673	138.744	156.957	133.984	212.06
								Triclosan	Day 1	Day 2	Day 3	Day 4	Day 5
									287.358	187.232	220.764	253.28	274.597
									126.402	122.387	109.278	141.947	148.293
									229.432	157.808	151.518	196.527	197.049
								Zidovudine	Day 1	Day 2	Day 3	Day 4	Day 5
									275.925	264.71	264.71	224.101	270.094
									137.819	72.9181	98.3447	84.181	84.0832
									221.334	103.71	138.108	121.787	129.116
		Albendazole	Day 1	Day 2	Day 3	Day 4	Day 5		Anova: Single Factor
		8am	2080.46	1729.76	1367.99	1153.77	2041.32		ANOVA
		1pm	1069.13	1103.09	866.764	506.148	1469.85		Source of Variation	SS	df	MS	F	P-value	F crit
		5pm	1863.18	1506.07	1224.15	1095.21	1751.82		Between Groups	1.48029e+06	4	370073	2.80003	0.0850338	3.47805
									Within Groups	1.32168e+06	10	132168
		Amoxicillin	Day 1	Day 2	Day 3	Day 4	Day 5
			218.36	197.471	218.017	221.231	226.603		Anova: Single Factor
			123.7	117.828	72.2437	99.7949	93.3991		ANOVA
			216.776	164.667	139.5	203.816	218.43		Source of Variation	SS	df	MS	F	P-value	F crit
									Between Groups	3562.67	4	890.668	0.225504	0.917954	3.47805
		Atazanavir	Day 1	Day 2	Day 3	Day 4	Day 5		ANOVA
			200.702	169.475	235.177	256.148	229.14		Source of Variation	SS	df	MS	F	P-value	F crit
			131.223	80.6503	67.6565	85.5491	126.673		Between Groups	3756.18	4	939.046	0.228125	0.9164	3.47805
			171.307	153.881	157.221	191.79	166.65		Within Groups	41163.7	10	4116.37
		Nevirapine	Day 1	Day 2	Day 3	Day 4	Day 5
			321.199	274.036	212.698	217.042	306.854		Anova: Single Factor
			172.364	127.547	135.827	148.207	191.202		ANOVA
			274.145	245.858	193.23	195.324	266.095		Source of Variation	SS	df	MS	F	P-value	F crit
									Between Groups	15468.7	4	3867.18	1.06794	0.421654	3.47805
									Within Groups	36211.5	10	3621.15
		Ofloxacin	Day 1	Day 2	Day 3	Day 4	Day 5
			395.782	216.789	306.701	184.86	348.232		Anova: Single Factor
			194.051	134.059	138.542	108.083	158.153		ANOVA
			262.409	210.092	241.883	138.677	245.774		Source of Variation	SS	df	MS	F	P-value	F crit
									Between Groups	36035.3	4	9008.82	1.48291	0.278808	3.47805
									Within Groups	60751	10	6075.1
		Paracetamol	Day 1	Day 2	Day 3	Day 4	Day 5		Anova: Single Factor
			1943.97	1254.49	1172.87	865.031	2089.05		ANOVA
			1047.74	887.621	592.367	418.801	889.178		Source of Variation	SS	df	MS	F	P-value	F crit
			1813.25	1000.41	1052.79	675.026	1888.96		Between Groups	2.17948e+06	4	544871	3.29442	0.0574505	3.47805
									Within Groups	1.65392e+06	10	165392
		Sulfamethoxazole	Day 1	Day 2	Day 3	Day 4	Day 5			ANOVA
			269.721	212.449	213.728	206.748	236.358			Source of Variation	SS	df	MS	F	P-value	F crit
			129.821	108.126	113.187	114.873	153.144			Between Groups	5521.91	4	1380.48	0.441066	0.776559	3.47805
			211.562	154.994	229.638	141.502	185.743			Within Groups	31298.6	10	3129.86
		Tetracycline	Day 1	Day 2	Day 3	Day 4	Day 5		ANOVA
			215.271	189.359	175.103	190.991	231.98		Source of Variation	SS	df	MS	F	P-value	F crit
			134.525	125.419	96.7067	186.017	172.502		Between Groups	7692.45	4	1923.11	1.44352	0.289803	3.47805
			204.673	138.744	156.957	133.984	212.06		Within Groups	13322.3	10	1332.23
		Triclosan	Day 1	Day 2	Day 3	Day 4	Day 5		ANOVA
			287.358	187.232	220.764	253.28	274.597		Source of Variation	SS	df	MS	F	P-value	F crit
			126.402	122.387	109.278	141.947	148.293		Between Groups	8747.19	4	2186.8	0.606604	0.667001	3.47805
			229.432	157.808	151.518	196.527	197.049		Within Groups	36049.8	10	3604.98
		Zidovudine	Day 1	Day 2	Day 3	Day 4	Day 5		ANOVA
			275.925	264.71	264.71	224.101	270.094		Source of Variation	SS	df	MS	F	P-value	F crit
			137.819	72.9181	98.3447	84.181	84.0832		Between Groups	8947.15	4	2236.79	0.29701	0.873351	3.47805
			221.334	103.71	138.108	121.787	129.116		Within Groups	75310.3	10	7531.03
