# Supplementary material
Source: Research Square preprint supplement (doi:10.21203/rs.3.rs-9883112/v1)
Supplement: Supplementary file 5 [file e2b8337c995e6a16e025f7c5.xlsx]

## Sheet: Table S2 Transitions & retentio
Table S2 Transitions, precursors and retention times of pesticides and polyphenols (standards and internal standards) considered in this study
Compound	Start Time (min)	End Time (min)	Polarity	Precursor (m/z)	Product (m/z)	Collision Energy (V)
Acetamiprid	0	15	Positive	223.145	90.226	37
Acetamiprid	0	15	Positive	223.145	126.134	24
Azoxystrobin	0	15	Positive	404.12	344.076	27
Azoxystrobin	0	15	Positive	404.12	372.067	16
Caffeic acid	0	15	Negative	179	107.058	21.9
Caffeic acid	0	15	Negative	179	135	15.1
Carbamazepin D10 Qual	0	15	Positive	247.143	202.111	34.32
Carbamazepin D10 Quan	0	15	Positive	247.143	204.111	21.073
Carbendazim	0	15	Positive	192.155	132.151	33
Carbendazim	0	15	Positive	192.155	160.13	20
Catechin	0	15	Positive	291	123.058	15.7
Catechin	0	15	Positive	291	139	15.7
Chlorogenic acid	0	15	Negative	353.07	179	15
Chlorogenic acid	0	15	Negative	353.07	191	16.5
Chlorpyrifos D10	0	15	Positive	361.939	200.889	20
Chlorpyrifos D10	0	15	Positive	361.939	329.889	10
Cyproconazole	0	15	Positive	292.17	70.326	22
Cyproconazole	0	15	Positive	292.17	125.121	30
Dimethoate	0	15	Positive	230.06	79.24	33
Dimethoate	0	15	Positive	230.06	125.085	24
Ferulic acid	0	15	Negative	193	134	15.7
Ferulic acid	0	15	Negative	193	178	12.6
Fluconalzole IS	0	15	Positive	311.096	222.986	18
Fluconalzole IS	0	15	Positive	311.096	242.058	16
Imidacloprid	0	15	Positive	256.135	175.136	21
Imidacloprid	0	15	Positive	256.135	209.101	19
Metalaxyl	0	15	Positive	280.2	160.172	26
Metalaxyl	0	15	Positive	280.2	220.128	16
Tebuconazole	0	15	Positive	308.2	70.338	24
Tebuconazole	0	15	Positive	308.2	125.106	35
Triadimefon	0	15	Positive	294.125	127.083	33
Triadimefon	0	15	Positive	294.125	141.076	25
