# Supplementary material
Source: Research Square preprint supplement (doi:10.21203/rs.3.rs-9883112/v1)
Supplement: Supplementary file 6 [file e77c4f2ea3fef2b0290b3ff2.xlsx]

## Sheet: Sheet1
	Table S4 Raw data of pesticides and polyphenols in (ng/L) and their limit of quantification (LOQ) for all 45 sampling sites
		Use	LOQ	T1	T2	T3	N1	T4	N2	T5	N3	T6	N4	N5	N6	N7	T7	N8	C1	N9	C2	N10	N11	N12	T8	N13	C3	N14	C4	N15	C5	C6	C7	N16	C8	N17	T9	C9	N18	N19	N20	N21	N22	T10	N23	N24	N25	N26
	Azoxystrobin	Fungicide	0.5	4.44503	9.34789	5.68035	5.02482	3.12743	3.99235	3.09294	2.80068	5.86519	3.09078	2.57655	2.11918	1.52281	4.95574	2.56432	5.61073	2.24566	5.91639	3.5505	3.04331	2.68205	3.039	2.66251	0.168626	2.03214	<LOQ	1.20314	2.71584	2.86339	3.44288	3.51288	0.845963	2.43527	3.33831	19.0922	3.66946	3.60852	3.51609	3.17943	2.55077	3.65214	3.16568	2.66533	2.2615	3.23671
	Caffeic acid	Polyphenol	5	52.4422	35.6074	72.6981	58.4131	24.5897	43.6841	22.6107	33.7613	57.0802	38.6393	29.5959	21.6135	16.3593	40.1486	25.7542	104.089	29.4089	160.18	60.5394	51.9727	43.6266	79.0341	55.9713	47.1631	43.9416	12.4754	34.0259	77.3326	73.8001	80.7385	41.7211	35.6074	34.9151	40.5038	78.3233	60.6194	60.7613	60.0453	57.2895	51.5974	23.1005	44.9729	37.6776	30.2121	26.4221
	Carbendazim	Fungicide	0.1	1.75235	3.46872	11.4466	5.50167	2.09199	4.56476	1.8527	3.31952	2.50533	2.91712	2.36731	1.87456	1.30709	4.46336	2.22084	2.07369	1.77509	1.88784	1.59827	1.25418	1.01787	1.81765	1.14235	<LOQ	0.697428	<LOQ	0.54618	<LOQ	<LOQ	<LOQ	0.454187	0.0864424	0.374929	0.731405	2.19768	1.12538	1.12102	1.12044	1.1114	0.834532	0.749471	0.717121	0.678391	0.59453	0.5197
	Catechin	polyphenol	0.1	3.92251	8.52815	3.67493	4.18726	2.69192	3.58103	1.94333	2.35403	1.77643	2.05609	1.62318	1.39712	1.0291	10.3087	2.29277	0.763353	1.66909	40.6607	2.6589	2.30548	2.04193	1.02238	1.64058	0.120502	1.19511	0.788201	0.781382	6.07382	7.25993	4.30842	2.95591	0.332587	2.29841	4.65904	5.89996	3.45312	3.41266	3.39048	3.15967	2.62777	1.02249	1.97069	1.41356	1.11366	0.821703
	Chlorogenic acid	polyphenol	0.5	9.07005	0.519694	9.16343	3.95943	17.3744	3.96951	9.70262	4.25281	6.17564	4.20151	3.55039	3.04716	2.49643	21.5146	3.35893	3.90922	3.30898	92.1193	5.20005	4.45372	3.77457	30.4338	4.56425	1.18441	4.17805	0.515708	2.94155	20.1591	24.2083	27.7523	4.41815	1.19244	3.67595	30.3645	41.4576	10.4148	16.301	16.0687	15.4557	13.9601	6.09046	8.56769	5.32625	3.53415	3.33771
	Cyproconazole	Fungicide	0.5	4.18951	4.33259	4.94716	4.21049	2.17488	3.26295	3.11705	2.90147	6.17113	3.54487	2.97645	2.6161	2.18021	5.28394	3.39413	0.488546	2.34267	1.65636	1.90573	1.59762	1.25523	5.84764	2.239	<LOQ	1.8528	<LOQ	1.17724	3.66077	3.98172	3.3844	2.50305	0.712684	1.77401	3.13667	2.01049	2.15465	2.13186	1.9768	1.7974	1.55249	3.98323	2.3736	2.05716	1.53243	1.14579
	Ferulic acid	Polyphenol	2	45.7844	35.2448	46.3628	40.8698	60.8698	45.3809	44.452	43.1804	33.1847	36.0039	30.1107	26.6189	23.4984	30.2641	27.3933	5.87915	20.8341	194.339	45.2113	40.2814	32.8428	42.061	37.2791	2.73897	28.7029	1.82027	23.0803	12.2513	14.2429	17.1304	10.5766	<LOQ	7.33419	52.6121	65.8671	28.4298	28.322	28.244	22.0774	18.9436	14.8003	20.2446	16.1947	13.8065	9.79328
	Metalaxyl	Fungicide	5	82.2323	105.557	92.7639	91.5326	90.9203	88.6655	85.963	81.4531	90.3747	83.7498	78.9546	74.2248	70.235	80.7866	75.5667	97.262	74.6958	58.9891	64.9891	60.0527	55.1385	81.8159	64.0744	30.1365	58.3139	21.0571	50.5434	73.132	54.7806	78.1391	55.0221	3.52198	44.5379	82.3558	124.772	70.6982	70.4766	69.9905	65.7889	59.5897	70.5835	63.3921	57.6582	51.8187	45.5475
	Tebuconazole	Fungicide	5	103.55	81.1969	91.5504	90.3202	95.7077	91.7433	62.3198	80.0027	85.3235	79.6207	73.3192	66.1503	63.7674	58.3876	61.3642	48.5659	53.2851	49.2499	43.2493	39.1556	34.0647	38.7923	35.6211	<LOQ	29.4038	<LOQ	21.1911	31.9124	30.5336	31.5033	22.9792	4.46088	15.1432	75.6982	69.5475	38.1296	38.0403	37.7582	34.4136	30.4793	18.2158	25.4135	20.2155	15.3324	11.6922
			N: samples from the river (26 sites)
			T: tributary (10 sites)
			C: Channels and drainages (9 sites)
